# Supplementary material for: Weak-conjugation linked donor–acceptor emitters for efficient near-ultraviolet organic light-emitting diodes with narrowed full width at half maximum
Source: Royal Society of Chemistry journal article supplement (doi:10.1039/d3tc02917d), 2023-01-01

# Weak-conjugation linked donor-acceptor emitters for efficient near-ultraviolet organic light-emitting diodes with narrowed full width at half maximum

Ziting Zhong,<sup>a,‡</sup> Zhangshan Liu,<sup>b,‡</sup> Xianhui Wang,<sup>a</sup> Dan Xiong,<sup>a</sup> Huihui Li,<sup>a</sup> Xin Jiang Feng,<sup>\*,a</sup> Zujin Zhao,<sup>\*,b</sup> and Hua Lu<sup>\*,a</sup>

## I. Supplementary Figures and Tables.

|                                                                                                                                                        |     |
|--------------------------------------------------------------------------------------------------------------------------------------------------------|-----|
| 1. Table S1 Crystal data and structure refinement for mo220117a.....                                                                                   | S2  |
| 2. Fig. S1 Thermogravimic analysis and differential scanning calorimetry traces.....                                                                   | S3  |
| 3. Fig. S2 Absorption spectra of <i>mCzPI</i> , <i>mMCzPI</i> and <i>oCzPI</i> in different solvents.....                                              | S3  |
| 4. Fig. S3 Emission spectra of <i>mCzPI</i> , <i>mMCzPI</i> and <i>oCzPI</i> in different solvents.....                                                | S3  |
| 5. Table S2 Photophysical properties of <i>mCzPI</i> , <i>mMCzPI</i> , and <i>oCzPI</i> in solvents.....                                               | S4  |
| 6. Fig. S4 Emission spectra of <i>mCzPI</i> , <i>mMCzPI</i> and <i>oCzPI</i> in film and in powder.....                                                | S4  |
| 7. Table S3 Emission band maxima and the absolute quantum yields in the solid-state.....                                                               | S5  |
| 8. Fig. S5 Emission spectra for <i>mCzPI</i> , <i>mMCzPI</i> , and <i>oCzPI</i> in THF/H <sub>2</sub> O.....                                           | S5  |
| 9. Fig. S6 Cyclic voltammograms curves of <i>mCzPI</i> , <i>mMCzPI</i> , and <i>oCzPI</i> .....                                                        | S5  |
| 10. Table S4 TD-DFT calculation using the B3LYP functional with 6-31G(d,p) basis sets.....                                                             | S6  |
| 11. Fig. S7 Singlet and triplet excited states calculated by B3LYP/6-31G(d,p).....                                                                     | S6  |
| 12. Fig. S8 Natural transition orbitals for S <sub>0</sub> to S <sub>n</sub> /T <sub>n</sub> for <i>mCzPI</i> , <i>mMCzPI</i> , and <i>oCzPI</i> ..... | S7  |
| 13. Fig. S9 Frontier molecular orbital diagrams for <i>mCzPI</i> by QM/MM method.....                                                                  | S7  |
| 14. Table S5 QM/MM calculation using the B3LYP functional with 6-31G(d,p) basis sets.....                                                              | S7  |
| 15. Fig. S10 Luminance-voltage-current density characteristics for devices.....                                                                        | S8  |
| 16. Fig. S11 External quantum efficiencies (EQE)-luminance characteristics.....                                                                        | S8  |
| 17. Fig. S12 EL spectra for devices.....                                                                                                               | S8  |
| 18. Fig. S13 Luminance versus current density and the fitted curve plot of the devices.....                                                            | S9  |
| 19. Table S6 External quantum efficiencies (EQE)-luminance characteristics.....                                                                        | S10 |
| II. General details and measurements specifications.....                                                                                               | S11 |
| III. <sup>1</sup> H NMR of <i>mCzPI</i> , <i>mMCzPI</i> , and <i>oCzPI</i> in CDCl <sub>3</sub> .....                                                  | S13 |

IV.  $^{13}\text{C}$  NMR of *mCzPI*, *mMCzPI*, and *oCzPI* in  $\text{CDCl}_3$ .....S16

V. HR-MS of *mCzPI*, *mMCzPI*, and *oCzPI*.....S18

### I. Supplementary Figures and Tables.

**Table S1** Crystal data and structure refinement for mo220117a.

|                                               |                                                                |
|-----------------------------------------------|----------------------------------------------------------------|
| Identification code                           | mo220117a                                                      |
| Empirical formula                             | $\text{C}_{49}\text{H}_{37}\text{N}_3$                         |
| Formula weight                                | 667.81                                                         |
| Temperature/K                                 | 296.15                                                         |
| Crystal system                                | orthorhombic                                                   |
| Space group                                   | $\text{P}2_12_12_1$                                            |
| $a/\text{\AA}$                                | 10.1481(8)                                                     |
| $b/\text{\AA}$                                | 14.2647(10)                                                    |
| $c/\text{\AA}$                                | 24.5582(18)                                                    |
| $\alpha/^\circ$                               | 90                                                             |
| $\beta/^\circ$                                | 90                                                             |
| $\gamma/^\circ$                               | 90                                                             |
| Volume/ $\text{\AA}^3$                        | 3555.0(5)                                                      |
| Z                                             | 4                                                              |
| $\rho_{\text{calc}}/\text{g/cm}^3$            | 1.248                                                          |
| $\mu/\text{mm}^{-1}$                          | 0.073                                                          |
| F(000)                                        | 1408.0                                                         |
| Crystal size/ $\text{mm}^3$                   | $0.15 \times 0.12 \times 0.12$                                 |
| Radiation                                     | $\text{MoK}\alpha$ ( $\lambda = 0.71073$ )                     |
| $2\Theta$ range for data collection/ $^\circ$ | 3.302 to 60.822                                                |
| Index ranges                                  | $-14 \leq h \leq 14, -20 \leq k \leq 17, -34 \leq l \leq 34$   |
| Reflections collected                         | 38727                                                          |
| Independent reflections                       | 10044 [ $R_{\text{int}} = 0.0610, R_{\text{sigma}} = 0.0686$ ] |
| Data/restraints/parameters                    | 10044/0/472                                                    |
| Goodness-of-fit on $F^2$                      | 1.001                                                          |
| Final R indexes [ $I \geq 2\sigma(I)$ ]       | $R_1 = 0.0501, wR_2 = 0.0916$                                  |
| Final R indexes [all data]                    | $R_1 = 0.1060, wR_2 = 0.1098$                                  |
| Largest diff. peak/hole / $e \text{\AA}^{-3}$ | 0.13/-0.14                                                     |
| Flack parameter                               | -0.7(10)                                                       |

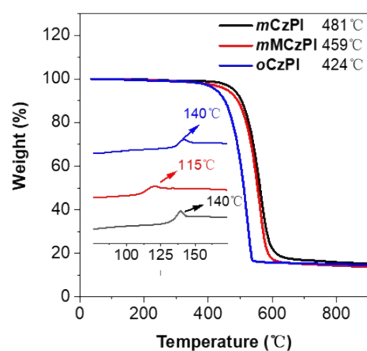

**Fig. S1** Thermogravimetric analysis (TGA) traces for *mCzPI*, *mMCzPI*, and *oCzPI*. Inset: differential scanning calorimetry (DSC) traces.

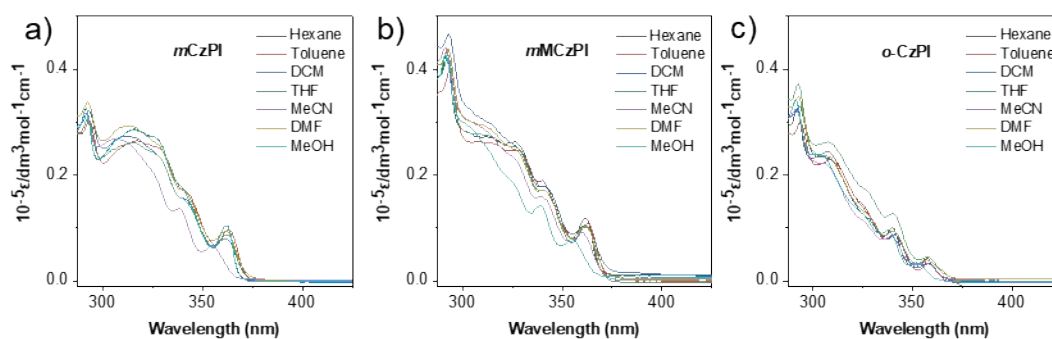

**Fig. S2** Absorption spectra of *mCzPI*(a), *mMCzPI*(b) and *oCzPI*(c) in different solvents.

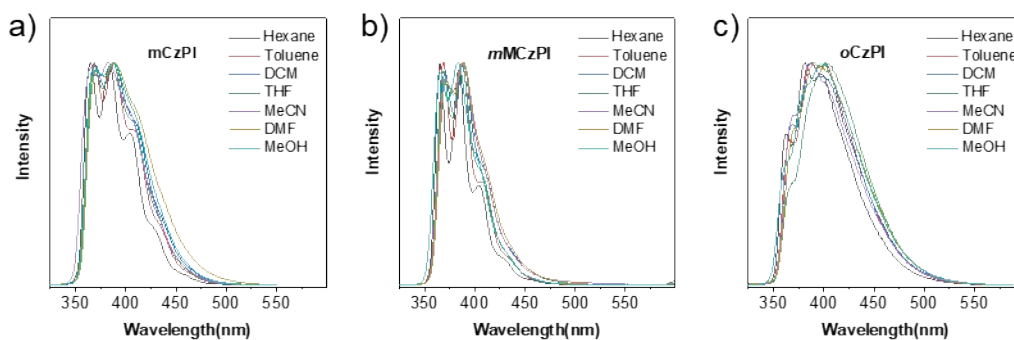

**Fig. S3** Emission spectra of *mCzPI*(a), *mMCzPI*(b) and *oCzPI*(c) in different solvents.

**Table S2** Photophysical properties of *mCzPI*, *mMCzPI*, and *oCzPI* in different solvents.

|                      | Solvent | $\lambda_{\text{abs}}^a$ (nm) | $\epsilon_{\text{abs}}^b$ (M cm <sup>-1</sup> ) | $\lambda_{\text{em}}^a$ (nm) | $\Delta\nu_{\text{em-abs}}^c$ (cm <sup>-1</sup> ) | $\Phi_F^d$ | $\tau_F$ (ns) <sup>e</sup> |
|----------------------|---------|-------------------------------|-------------------------------------------------|------------------------------|---------------------------------------------------|------------|----------------------------|
| <b><i>mCzPI</i></b>  | Hexane  | 317                           | 32700                                           | 364                          | 4073                                              | 0.47       | 4.0                        |
|                      | Toluene | 318                           | 30400                                           | 369                          | 4346                                              | 0.62       | 3.9                        |
|                      | DCM     | 312                           | 32200                                           | 389                          | 6344                                              | 0.58       | 5.8                        |
|                      | THF     | 315                           | 30600                                           | 387                          | 5906                                              | 0.37       | 5.6                        |
|                      | MeCN    | 308                           | 31700                                           | 383                          | 6358                                              | 0.56       | 5.1                        |
|                      | DMF     | 314                           | 33800                                           | 389                          | 6140                                              | 0.50       | 6.5                        |
|                      | MeOH    | 310                           | 32600                                           | 387                          | 6418                                              | 0.53       | 5.1                        |
| <b><i>mMCzPI</i></b> | Hexane  | 327                           | 42700                                           | 365                          | 3184                                              | 0.43       | 4.4                        |
|                      | Toluene | 328                           | 43700                                           | 368                          | 3314                                              | 0.27       | 4.1                        |
|                      | DCM     | 327                           | 39700                                           | 388                          | 4808                                              | 0.54       | 4.6                        |
|                      | THF     | 326                           | 46700                                           | 385                          | 4701                                              | 0.19       | 5.3                        |
|                      | MeCN    | 324                           | 42700                                           | 388                          | 5091                                              | 0.53       | 4.7                        |
|                      | DMF     | 327                           | 44100                                           | 388                          | 4808                                              | 0.44       | 8.5                        |
|                      | MeOH    | 325                           | 44000                                           | 383                          | 4660                                              | 0.52       | 4.8                        |
| <b><i>oCzPI</i></b>  | Hexane  | 308                           | 34000                                           | 382                          | 6290                                              | 0.21       | 2.3                        |
|                      | Toluene | 309                           | 32500                                           | 386                          | 6456                                              | 0.15       | 2.7                        |
|                      | DCM     | 308                           | 30000                                           | 388                          | 6694                                              | 0.29       | 3.4                        |
|                      | THF     | 308                           | 33100                                           | 402                          | 7591                                              | 0.15       | 3.5                        |
|                      | MeCN    | 306                           | 37200                                           | 388                          | 6907                                              | 0.22       | 3.0                        |
|                      | DMF     | 306                           | 32400                                           | 390                          | 7039                                              | 0.22       | 3.6                        |
|                      | MeOH    | 304                           | 34900                                           | 401                          | 7957                                              | 0.32       | 3.1                        |

<sup>a</sup> Absorption and emission maxima. <sup>b</sup> Molar absorption coefficients measured in solution. <sup>c</sup> Stokes-shift value. <sup>d</sup> Fluorescence quantum yield. <sup>e</sup> Fluorescence lifetime detected at the maximum fluorescence wavelengths.

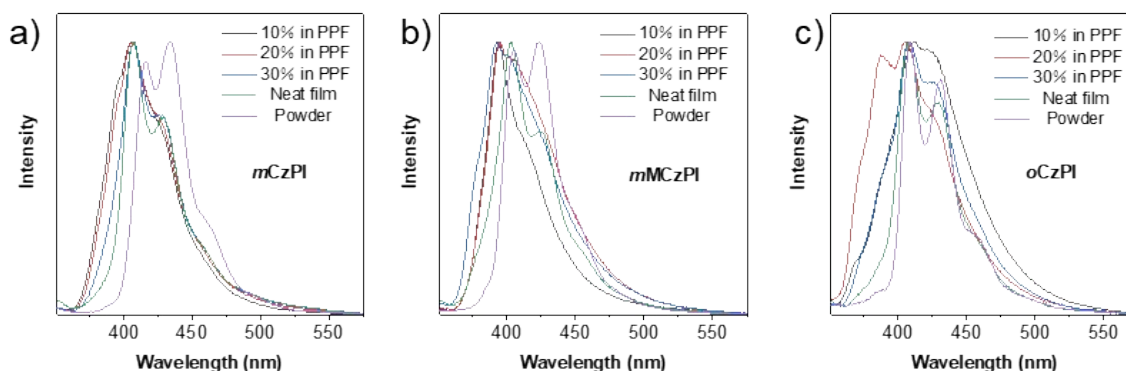

**Fig. S4** Emission spectra of a) *mCzPI*, b) *mMCzPI* and c) *oCzPI* in film and in powder.

**Table S3** Emission band maxima and the absolute quantum yields of *mCzPI*, *mMCzPI*, and *oCzPI* in PPF film and the powder form.

| $E_m/\Phi_F$  | Film       |            |            |          | Powder   |
|---------------|------------|------------|------------|----------|----------|
|               | 10% in PPF | 20% in PPF | 30% in PPF | Neat     |          |
| <i>mCzPI</i>  | 406/0.60   | 406/0.50   | 408/0.42   | 406/0.33 | 433/0.51 |
| <i>mMCzPI</i> | 394/0.45   | 395/0.55   | 393/0.49   | 403/0.31 | 423/0.51 |
| <i>oCzPI</i>  | 412/0.61   | 405/0.50   | 408/0.48   | 408/0.32 | 408/0.61 |

PPF = 2,8-bis(diphenylphosphoryl)dibenzo[b,d]furan

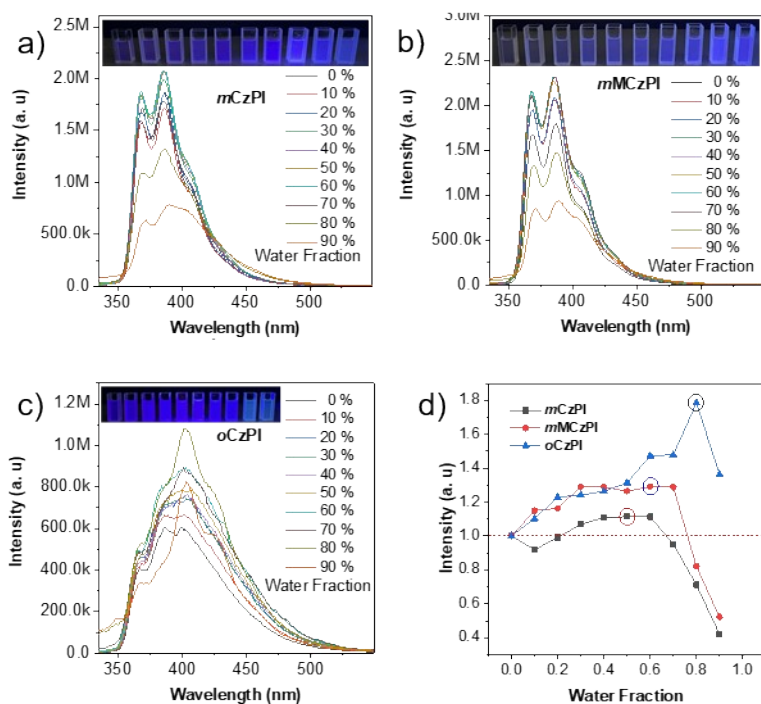

**Fig. S5** Emission spectra and intensity for a) *mCzPI*, b) *mMCzPI*, c) *oCzPI* with different water fractions in THF/H<sub>2</sub>O and d) the relative intensity comparison with different water fractions..

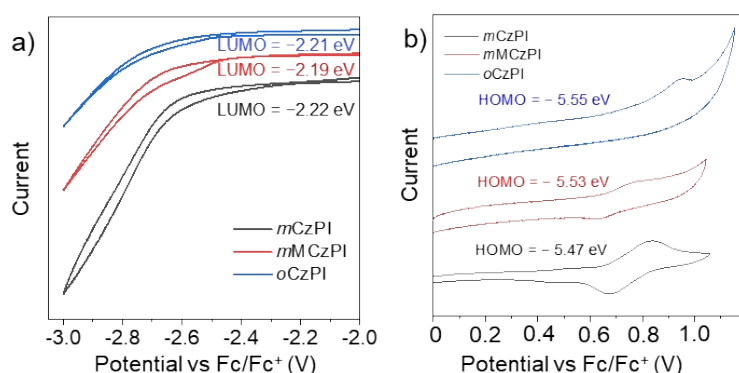

**Fig. S6** Cyclic voltammograms curves of *mCzPI*, *mMCzPI*, and *oCzPI* measured in a) DMF for reduction and b) CH<sub>2</sub>Cl<sub>2</sub> for oxidation versus Fc/Fc<sup>+</sup>.

**Table S4** Calculated excited wavelength ( $\lambda$ ), oscillator strengths ( $f$ ) and the related wave functions calculated by using the B3LYP functional with 6-31G(d,p) basis sets by TDDFT method in the gas phase.

|                | State <sup>a</sup> | E (eV) <sup>b</sup> | $\lambda$ (nm) <sup>c</sup> | $f$ <sup>d</sup> | Orbital (coefficient) <sup>e</sup>                        |
|----------------|--------------------|---------------------|-----------------------------|------------------|-----------------------------------------------------------|
| <b>mCzPI</b>   | S <sub>1</sub>     | 3.63                | 342                         | 0.6084           | H-1→L (56%), H→L (31%)                                    |
|                | S <sub>2</sub>     | 3.71                | 335                         | 0.0863           | H-1→L (28%), H→L (54%)                                    |
|                | S <sub>3</sub>     | 3.77                | 329                         | 0.0581           | H→L+1 (51%), H→L+2 (29%)                                  |
|                | S <sub>4</sub>     | 3.83                | 324                         | 0.0211           | H→L+1 (39%), H→L+2 (38%)                                  |
|                | S <sub>5</sub>     | 3.96                | 313                         | 0.0656           | H-1→L (11%), H-1→L+1 (65%)                                |
|                | S <sub>6</sub>     | 4.01                | 310                         | 0.0611           | H-1→L+3 (78%), H→L+3 (13%)                                |
|                | S <sub>7</sub>     | 4.04                | 307                         | 0.0288           | H→L+4 (82%)                                               |
|                | S <sub>8</sub>     | 4.09                | 304                         | 0.0335           | H-3→L (19%), H→L+5 (50%)                                  |
|                | S <sub>10</sub>    | 4.22                | 295                         | 0.0331           | H-1→L+2 (14%), H→L+6 (53%)                                |
|                | <b>mMCzPI</b>      | S <sub>1</sub>      | 3.72                        | 334              | 0.495                                                     |
| S <sub>2</sub> |                    | 3.77                | 330                         | 0.1417           | H-1→L (26%), H→L (62%)                                    |
| S <sub>3</sub> |                    | 3.87                | 321                         | 0.0722           | H-1→L+1 (71%)                                             |
| S <sub>4</sub> |                    | 4.01                | 310                         | 0.0318           | H-3→L (10%), H-1→L+1 (14%), H-1→L+2 (53%)                 |
| S <sub>5</sub> |                    | 4.05                | 307                         | 0.1483           | H→L+1 (27%), H→L+2 (40%)                                  |
| S <sub>6</sub> |                    | 4.07                | 305                         | 0.0432           | H→L+4 (86%)                                               |
| <b>oCzPI</b>   | S <sub>1</sub>     | 3.66                | 339                         | 0.2095           | H→L (90%)                                                 |
|                | S <sub>2</sub>     | 3.82                | 325                         | 0.1516           | H-1→L (83%)                                               |
|                | S <sub>4</sub>     | 4.06                | 306                         | 0.0543           | H→L+4 (87%)                                               |
|                | S <sub>6</sub>     | 4.11                | 302                         | 0.0857           | H-1→L+2 (16%), H→L+1 (17%), H→L+3 (53%)                   |
|                | S <sub>8</sub>     | 4.21                | 295                         | 0.0206           | H-1→L+2 (30%), H-1→L+3 (44%), H→L+2 (12%)                 |
|                | S <sub>10</sub>    | 4.24                | 293                         | 0.0335           | H-3→L (18%), H-1→L+1 (10%), H-1→L+5 (38%),<br>H→L+5 (18%) |

<sup>a</sup> Excited state. <sup>b</sup> Calculated energy gaps. <sup>c</sup> Experimental absorption wavelengths <sup>d</sup> Oscillator strength (values < 0.02 are not included). <sup>e</sup> MOs involved in the transitions, H = HOMO, L = LUMO.

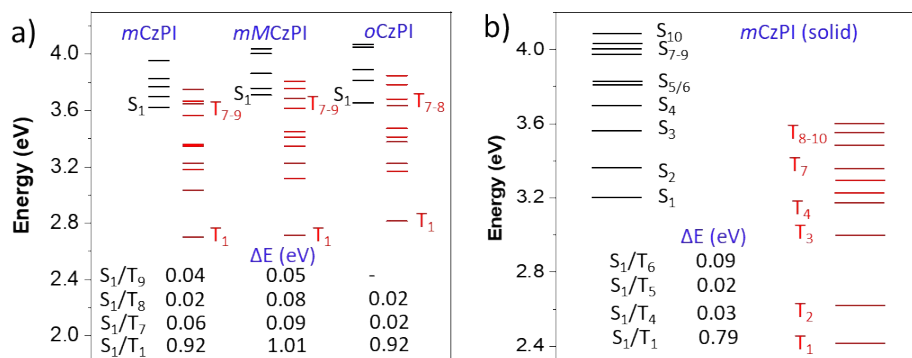

**Fig. S7** Singlet and triplet excited states calculated by B3LYP/6-31G(d,p) by TDDFT method for *mCzPI*, *mMCzPI*, and *oCzPI* in the gas phase a) and by QM/MM method for *mCzPI* in the solid state b).

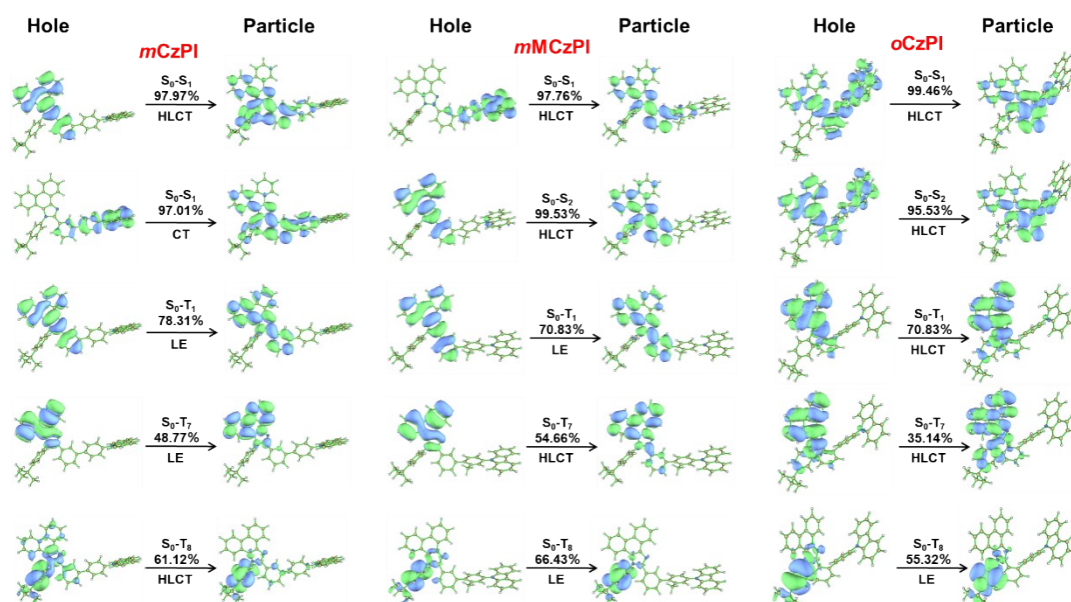

**Fig. S8** Natural transition orbitals for  $S_0$  to  $S_n/T_n$  for *mCzPI*, *mMCzPI*, and *oCzPI*. The isosurface value is 0.02 au.

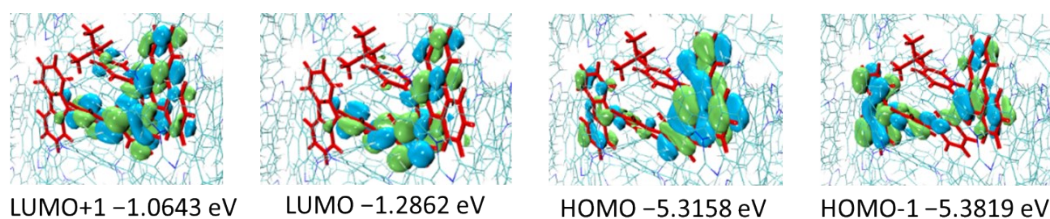

**Fig. S9** Frontier molecular orbital diagrams for *mCzPI* with B3LYP/6-31G(d,p) by QM/MM method (HOMO-1, HOMO, LUMO, LUMO+1 from right to left). The isosurface value is 0.02 au.

**Table S5** Calculated excited wavelength ( $\lambda$ ), oscillator strengths ( $f$ ) and the related wave functions calculated by using the B3LYP functional with 6-31G(d,p) basis sets by QM/MM method.

| State <sup>a</sup> | E (eV) <sup>b</sup> | $\lambda$ (nm) <sup>c</sup> | $f$ <sup>d</sup> | Orbital (coefficient) <sup>e</sup> |
|--------------------|---------------------|-----------------------------|------------------|------------------------------------|
|--------------------|---------------------|-----------------------------|------------------|------------------------------------|

| <i>mCzPI</i>          |      |     |        |                                                    |  |
|-----------------------|------|-----|--------|----------------------------------------------------|--|
| <i>S</i> <sub>1</sub> | 3.20 | 387 | 0.0920 | H-1→L (9%), H→L (89%)                              |  |
| <i>S</i> <sub>2</sub> | 3.36 | 369 | 0.5869 | H-1→L (90%), H→L+1 (11%)                           |  |
| <i>S</i> <sub>3</sub> | 3.56 | 348 | 0.2433 | H-1→L (9%), H→L+1 (79%)                            |  |
| <i>S</i> <sub>6</sub> | 3.83 | 323 | 0.0273 | H-1→L+1 (91%)                                      |  |
| <i>S</i> <sub>7</sub> | 3.98 | 311 | 0.0669 | H-1→L+3 (78%), H→L+3 (10%)                         |  |
| <i>S</i> <sub>8</sub> | 3.99 | 310 | 0.0354 | H-3→L (21%), H→L+4 (64%)                           |  |
| <i>S</i> <sub>9</sub> | 4.03 | 308 | 0.0721 | H-3→L (51%), H→L+4 (13%), H→L+5 (16%), H→L+6 (13%) |  |

<sup>a</sup> Excited state. <sup>b</sup> Calculated energy gaps. <sup>c</sup> Experimental absorption wavelengths <sup>d</sup> Oscillator strength (values < 0.02 are not included). <sup>e</sup> MOs involved in the transitions, H = HOMO, L = LUMO.

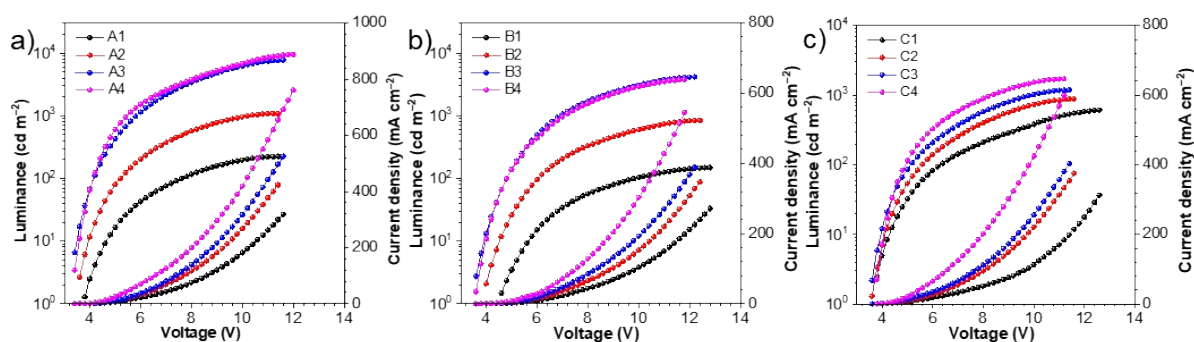

**Fig. S10** Luminance-voltage-current density characteristics for devices using a) *mCzPI*, b) *mMCzPI*, and c) *oCzPI* as emitters.

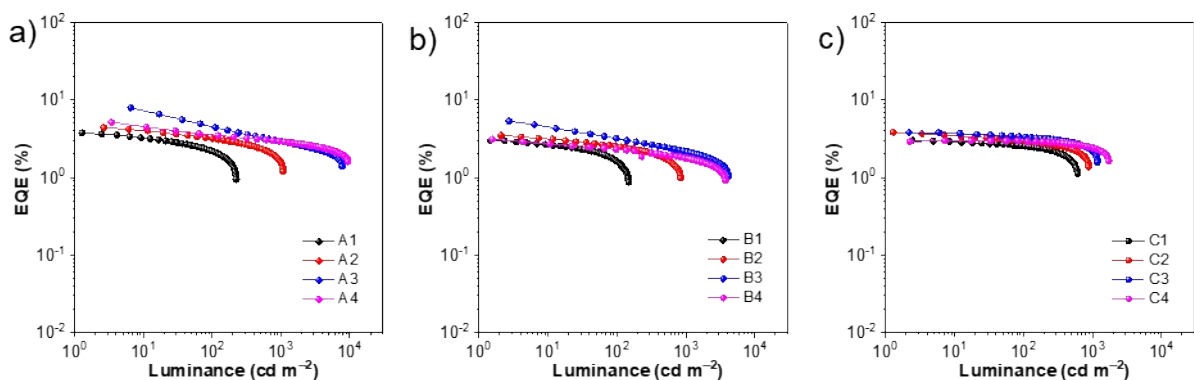

**Fig. S11** External quantum efficiencies (EQE)-luminance characteristics for devices using a) *mCzPI*, b) *mMCzPI*, and c) *oCzPI* as emitters.



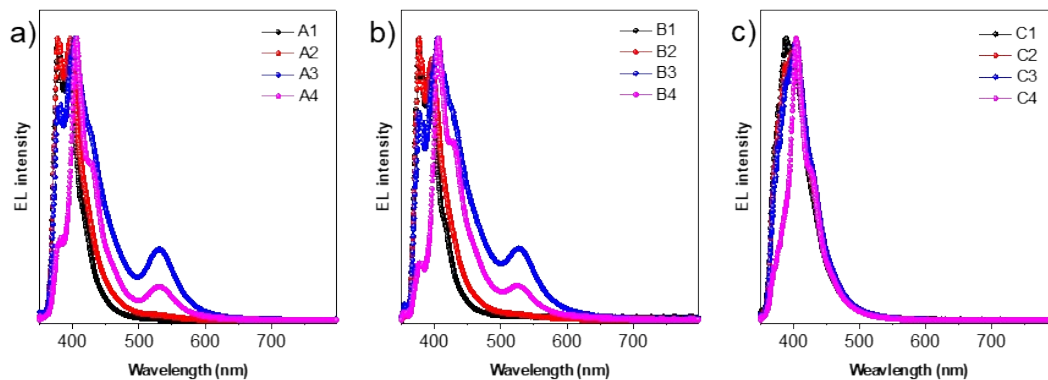

Fig. S12 EL spectra for devices using a) *mCzPI*, b) *mMCzPI*, and c) *oCzPI* as emitters.

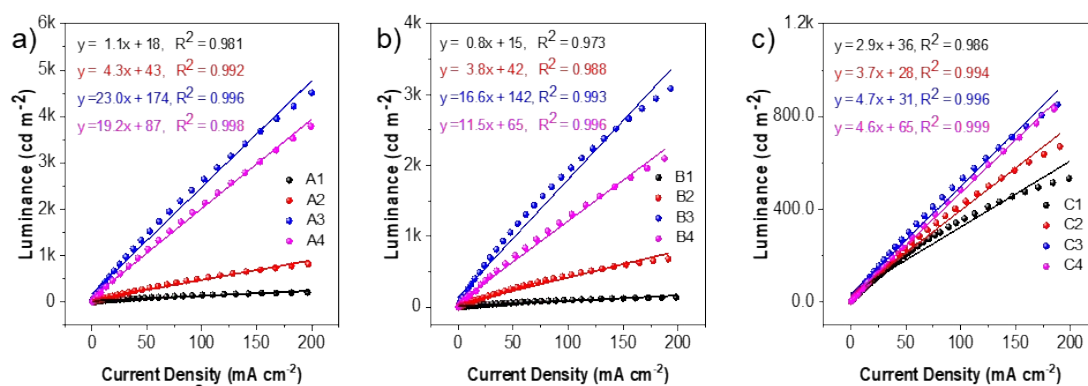

Fig. S13 Luminance versus current density (symbol) and the fitted curve plot (line) of devices.

**Table S6** EL performance of devices using *mCzPI*, *mMCzPI*, and *oCzPI* as emitters.

| Device <sup>e</sup> | $\lambda_{\text{EL}}$ (nm) | $V^a$<br>(V) | $L^b$<br>(cd m <sup>-2</sup> ) | $\eta_c^b$            | $\eta_p^b$            | $\eta_{\text{ext}}^b$ (%) | $\eta_r$ (%) <sup>c</sup> | CIE (x, y) <sup>d</sup> |
|---------------------|----------------------------|--------------|--------------------------------|-----------------------|-----------------------|---------------------------|---------------------------|-------------------------|
|                     |                            |              |                                | (cd A <sup>-1</sup> ) | (lm W <sup>-1</sup> ) |                           |                           |                         |
| <b>A1</b>           | 376/395                    | 3.7          | 223.5                          | 0.28/0.16             | 0.23/0.07             | 3.78/2.20                 | 21–32%                    | (0.165, 0.028)          |
| <b>A2</b>           | 377/396                    | 3.5          | 1079                           | 0.95/0.68             | 0.83/0.41             | 4.45/3.17                 | 30–45%                    | (0.166, 0.062)          |
| <b>A3</b>           | 404                        | 3.3          | 7730                           | 8.47/4.71             | 7.82/3.52             | 7.97/4.43                 | 62–93%                    | (0.185, 0.199)          |
| <b>A4</b>           | 406                        | 3.3          | 9417                           | 3.99/2.70             | 3.68/2.02             | 5.17/3.50                 | 37–56%                    | (0.178, 0.144)          |
| <b>B1</b>           | 376/393                    | 4.5          | 148.5                          | 0.19/0.10             | 0.13/0.03             | 3.03/1.64                 | 22–34%                    | (0.166, 0.027)          |
| <b>B2</b>           | 376/395                    | 3.9          | 839.2                          | 0.87/0.62             | 0.68/0.33             | 3.53/2.54                 | 21–32%                    | (0.170, 0.072)          |
| <b>B3</b>           | 404                        | 3.5          | 4146                           | 5.54/2.23             | 4.83/1.00             | 5.34/2.15                 | 36–54%                    | (0.183, 0.184)          |
| <b>B4</b>           | 406                        | 3.5          | 3739                           | 2.35/1.35             | 2.05/0.61             | 3.13/1.80                 | 34–50%                    | (0.176, 0.130)          |
| <b>C1</b>           | 388                        | 3.7          | 612.5                          | 0.58/0.44             | 0.44/0.22             | 3.04/2.54                 | 17–25%                    | (0.163, 0.045)          |
| <b>C2</b>           | 404                        | 3.5          | 878.3                          | 0.66/0.51             | 0.58/0.29             | 3.85/2.97                 | 26–39%                    | (0.162, 0.042)          |
| <b>C3</b>           | 404                        | 3.5          | 1183                           | 0.71/0.62             | 0.62/0.38             | 3.83/3.35                 | 27–40%                    | (0.162, 0.043)          |
| <b>C4</b>           | 404                        | 3.7          | 1718                           | 0.53/0.52             | 0.43/0.33             | 2.99/2.93                 | 31–47%                    | (0.162, 0.037)          |

<sup>a</sup> Turn-on voltage at 1 cd m<sup>-2</sup>. <sup>b</sup> The luminance ( $L$ ), current efficiency ( $\eta_c$ ), power efficiency ( $\eta_p$ ) and external quantum efficiency ( $\eta_{\text{ext}}$ ) of the devices: maximum values/ values at 100 cd m<sup>-2</sup>. <sup>c</sup> Exciton utility efficiency ( $\eta_r$ ), calculated by  $\eta_{\text{ext}} = \gamma \times \eta_{\text{PL}} \times \eta_r \times \eta_{\text{out}}$ , in which  $\gamma$  is a balance factor of carriers (100%),  $\eta_{\text{PL}}$  is the film fluorescent efficiencies, and  $\eta_{\text{out}}$  stands for the light extraction rate ( $0.25 \pm 0.05$  for ITO glass substrate). <sup>d</sup> CIE coordinates at 100 cd/m<sup>2</sup>. <sup>e</sup> Device configurations and the functional materials used are as follows:

ITO/HATCN(5 nm)/TAPC(50 nm)/TcTa(5 nm)/mCP (5 nm)/EML(20 nm)/PPF(5 nm)/TmPyPB(30 nm)/LiF(1 nm)/Al

**A1:** EML = 10% *mCzPI*: PPF

**A2:** EML = 20% *mCzPI*: PPF

**A3:** EML = 30% *mCzPI*: PPF

**A4:** EML = *mCzPI*

**B1:** EML = 10% *mMCzPI*: PPF

**B2:** EML = 20% *mMCzPI*: PPF

**B3:** EML = 30% *mMCzPI*: PPF

**B4:** EML = *mMCzPI*

**C1:** EML = 10% *oMCPI*: PPF

**C2:** EML = 20% *oMCPI*: PPF

**C3:** EML = 30% *oMCPI*: PPF

**C4:** EML = *oMCPI*

Indium tin oxide (ITO) is transparent an anode; dipyrzino[2,3-f:2',3'-h]quinoxaline-2,3,6,7,10,11-hexacarbonitrile (HATCN) is applied as a hole injection layer; 4,4'-cyclohexylidenebis[*N,N*-bis(4-methylphenyl)aniline] (TAPC) is a hole-transporting layer; tris[4-(carbazol-9-yl)phenyl]amine (TCTA) functions not only as a hole-transporting layer but also an electron-blocking layer; 1,3-bis(carbazol-9-yl)benzene (mCP) works as a buffer layer between hole-transporting layer and EML; (2,8-bis(diphenylphosphoryl)dibenzo[b,d]furan) (PPF) is used as an exciton blocking layer and host in doped devices; 1,3,5-tri(m-pyrid-3-yl-phenyl)benzene (TmPyPB) is utilized as an electron-transporting layer, and LiF/Al works as a cathode.

## II. Measurements

### *Photophysical, thermal and electrochemical property measurements*

<sup>1</sup>H and <sup>13</sup>C NMR spectra were recorded on a Bruker AM 400/500 spectrometer. Mass spectrometric measurements were recorded using a MicroQII mass spectrometer. The differential scanning calorimetry (DSC) analysis was performed with 10 °C min<sup>-1</sup> heating rate under nitrogen flushing using a TA Instruments DSC 2920. Thermogravimetric analysis was undertaken using a TGA instrument (PE-TGA6) with 20 °C min<sup>-1</sup> heating rate under nitrogen. UV-Vis spectra were recorded using a Shimadzu UV-1800 spectrophotometer. Samples for absorption and emission measurements were contained in 1×1 cm quartz cuvettes. Dilute solution with an absorbance of less than 0.05 at the excited wavelength was used for the measurement of fluorescent quantum yields, and the absolutely quantum yields of the materials were determined with a Hamamatsu C13534 spectrometer. Cyclic voltammetric (CV) measurements were carried out in a conventional three-electrode cell, using a Pt button working electrode, a platinum wire counter electrode, and an Ag/AgNO<sub>3</sub> reference electrode using a computer-controlled CHI650E at room temperature in dichloromethane (for oxidation) or dimethylformamide (for reduction) containing Bu<sub>4</sub>NPF<sub>6</sub> (0.1 M) as the supporting electrolyte.

### *Single crystal structure measurement*

Diffraction data were collected on a Bruker Smart Apex II CCD diffractometer or Bruker AXS Apex II diffractometer with graphite-monochromated Mo-Kα ( $\lambda = 0.71073 \text{ \AA}$ ). An empirical (multi-scan) or numerical absorption correction was applied with the program SADABS. The structures were solved by direct method and subsequently refined on *F*<sup>2</sup> by using full-matrix least-squares techniques (SHELXTL). The non-hydrogen atoms were refined anisotropically, and hydrogen atoms were located at calculated positions or found in the *F*map. A summary of the crystallographic data and selected experimental information are given in Table S1. The X-ray crystallographic coordinates for the structures reported in this article have been deposited at the Cambridge Crystallographic Data Centre (CCDC) under deposition numbers CCDC 2285450. These data can be obtained free of charge from The Cambridge Crystallographic Data Centre via [www.ccdc.cam.ac.uk/data\\_request/cif](http://www.ccdc.cam.ac.uk/data_request/cif).

### *Device fabrication and EL performance measurements*

Glass substrates pre-coated with a 90 nm-thin layer of indium tin oxide (ITO) with a sheet resistance of 15–20 Ω per square were thoroughly cleaned for 10 minutes in ultrasonic bath of acetone, isopropyl alcohol, detergent, deionized water, and isopropyl alcohol and then treated with O<sub>2</sub> plasma for 10 min

in sequence. All of the organic materials used were purified by a vacuum sublimation approach. Organic layers were deposited onto the ITO-coated substrates by high-vacuum ( $< 5 \times 10^{-4}$  Pa) thermal evaporation. Deposition rates were controlled by independent quartz crystal oscillators, which are 1~2  $\text{\AA s}^{-1}$  for organic materials, 0.1  $\text{\AA s}^{-1}$  for LiF, and 5  $\text{\AA s}^{-1}$  for Al, respectively. The emission area of the devices is 3 mm  $\times$  3 mm as shaped by the overlapping area of the anode and cathode. All the device characterization steps were carried out at room temperature under ambient laboratory conditions without encapsulation. EL spectra were taken by normal direction utilizing a spectrometer (Ocean Optics USB 2000+). Luminance–voltages– current density characteristics were measured by PIN-25D silicon photodiode, along with a Keithley 2400 Source Meter. The external quantum efficiencies were estimated utilizing the normalized EL spectra and the current efficiencies of the devices, assuming that the devices are Lambertian emitters.

### III. $^1\text{H}$ NMR spectra of the compounds in $\text{CDCl}_3$

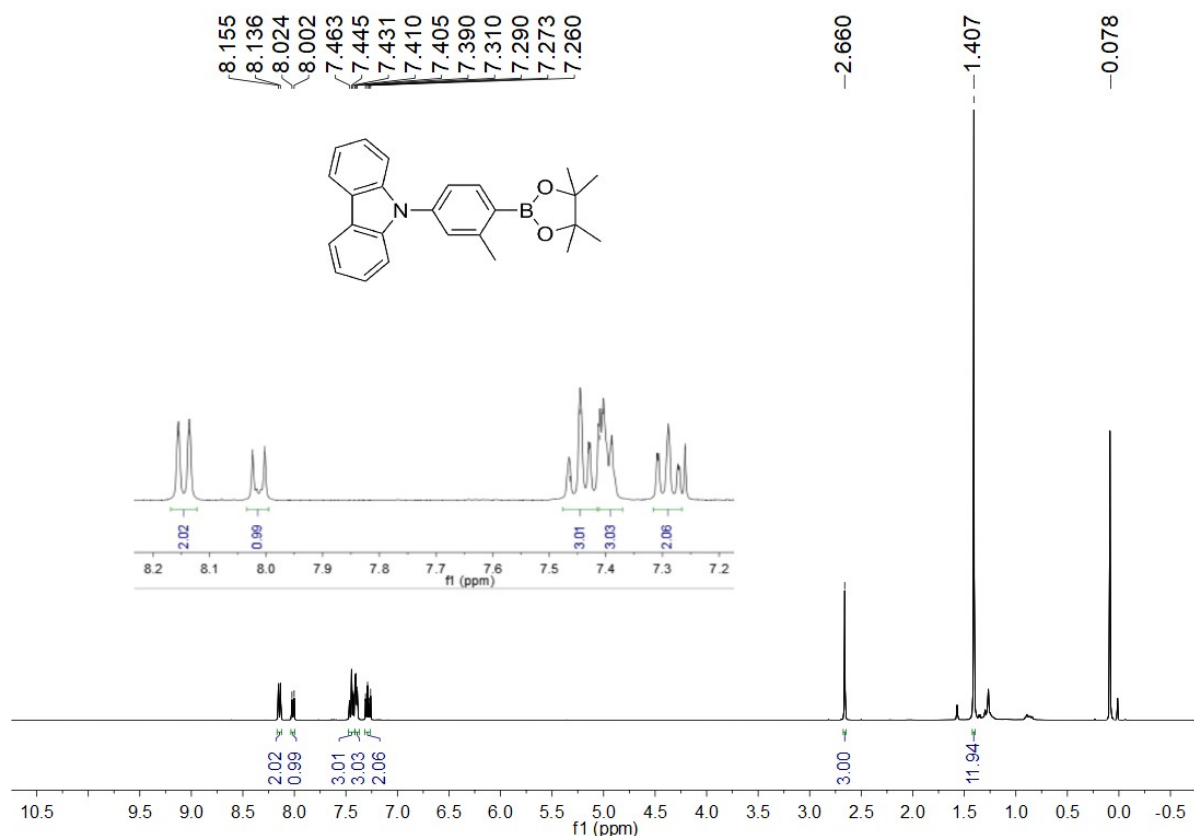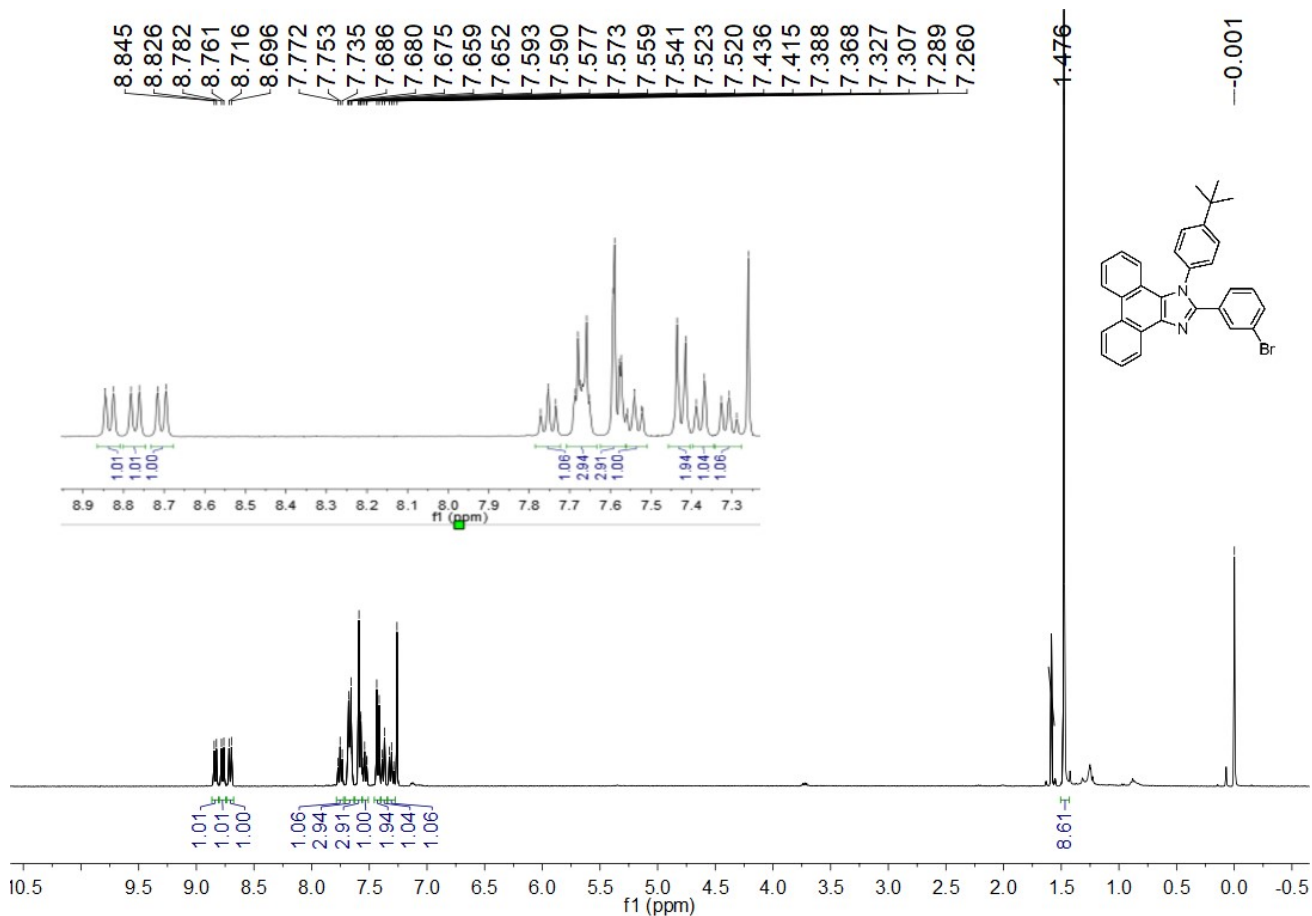

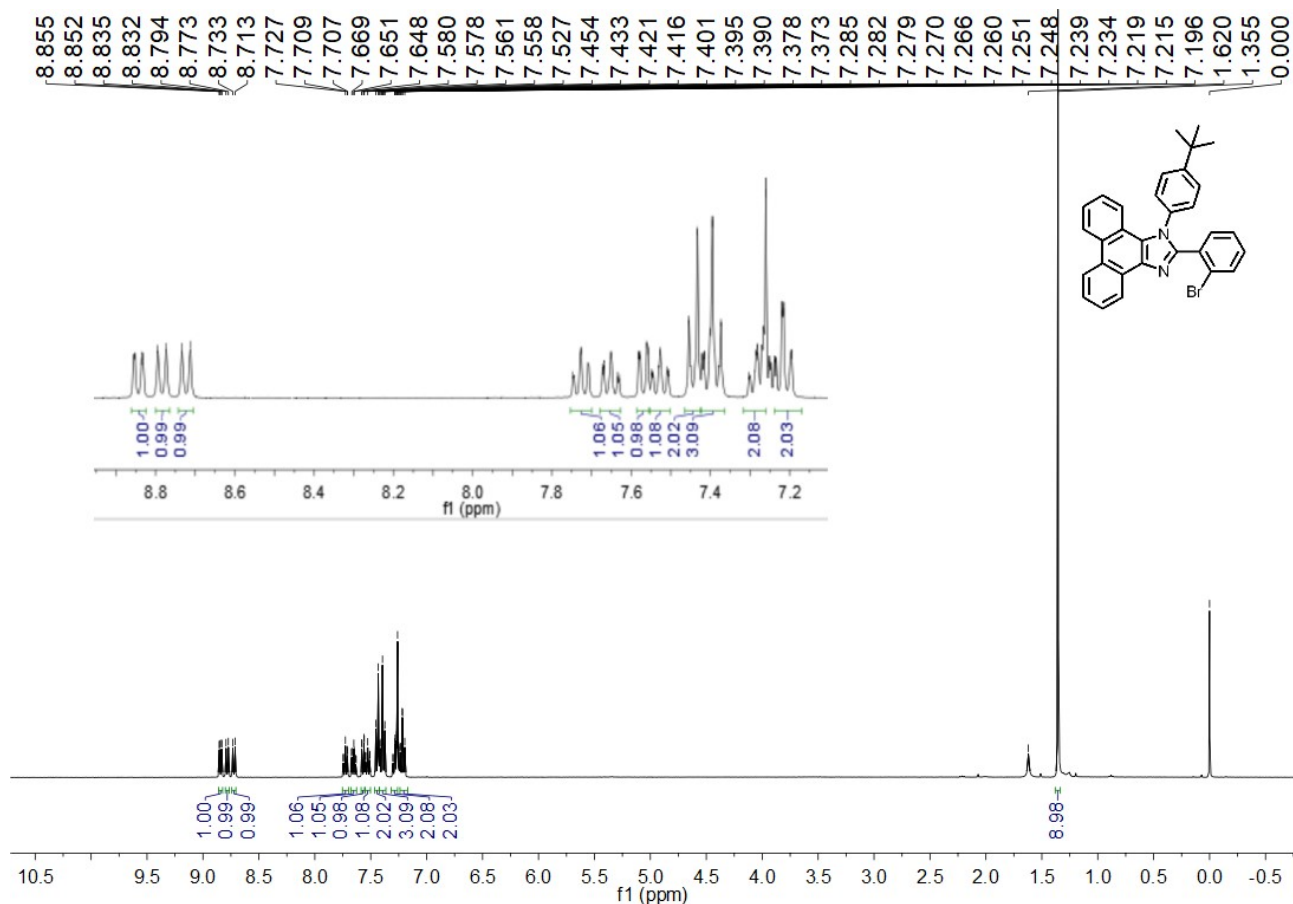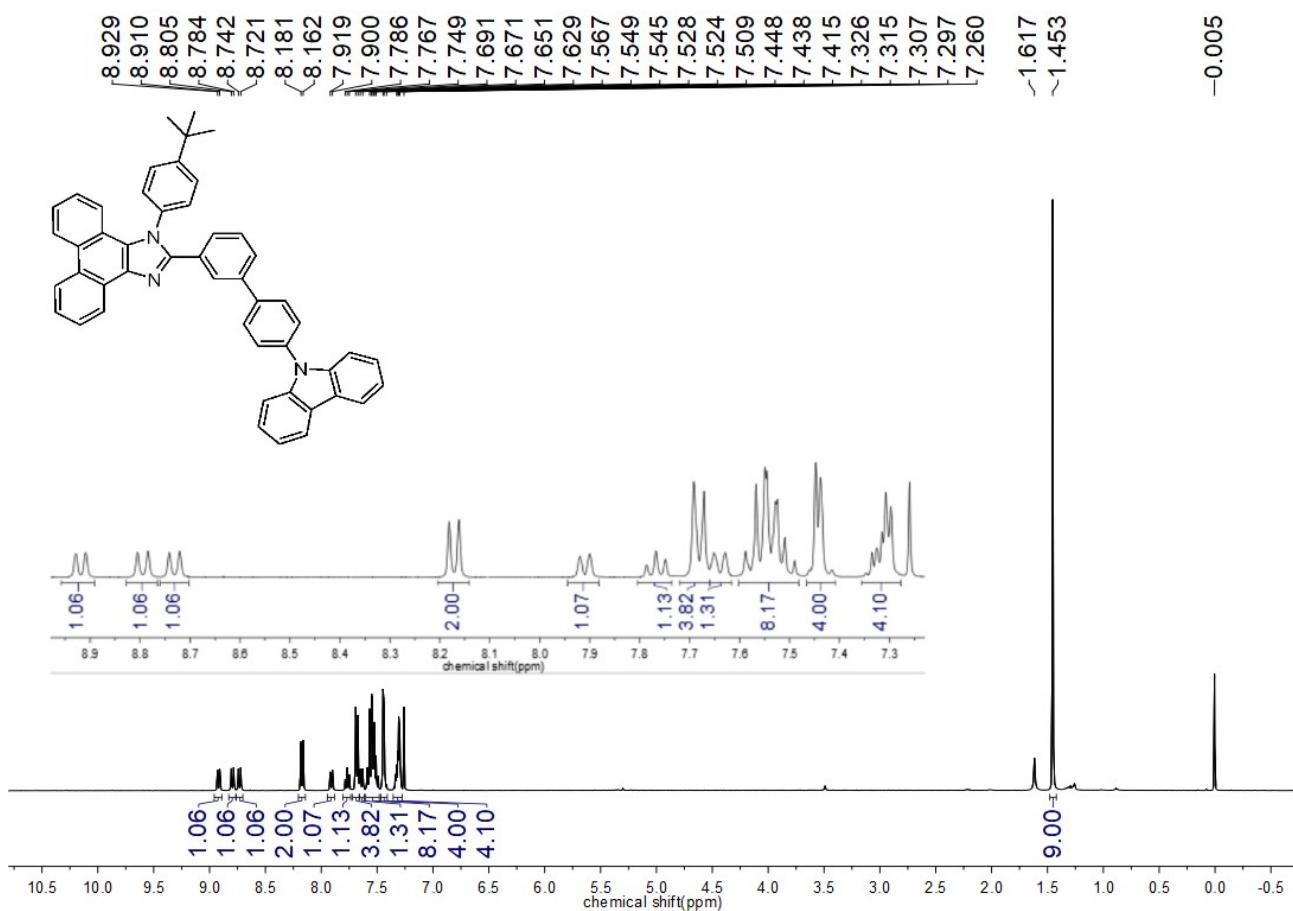

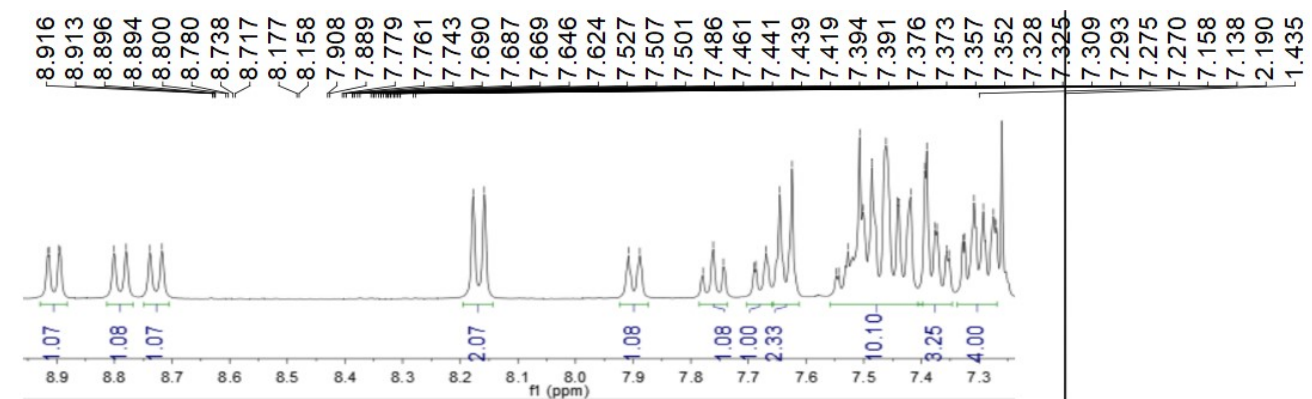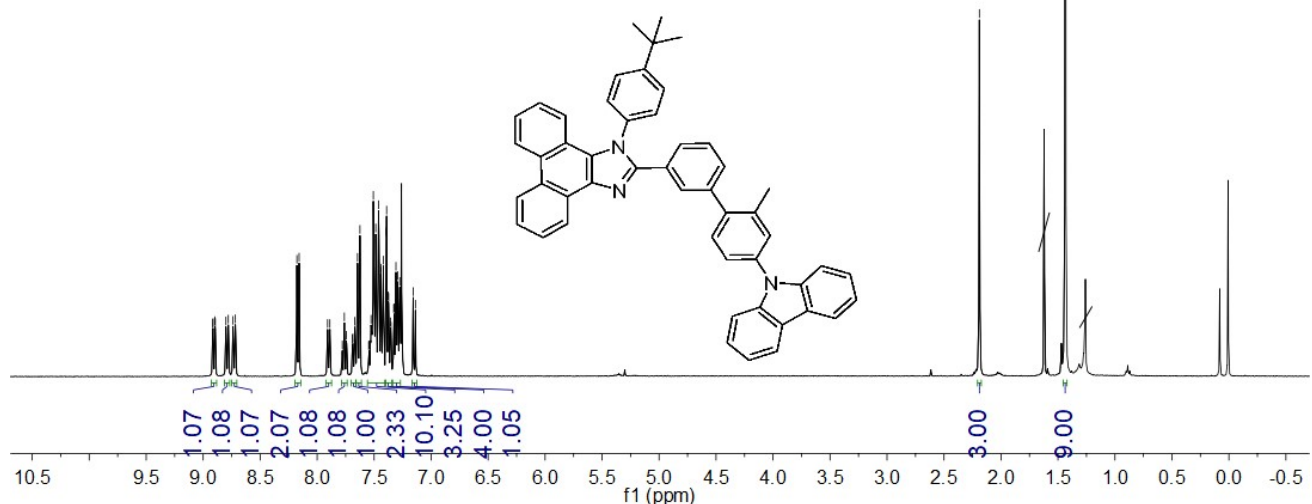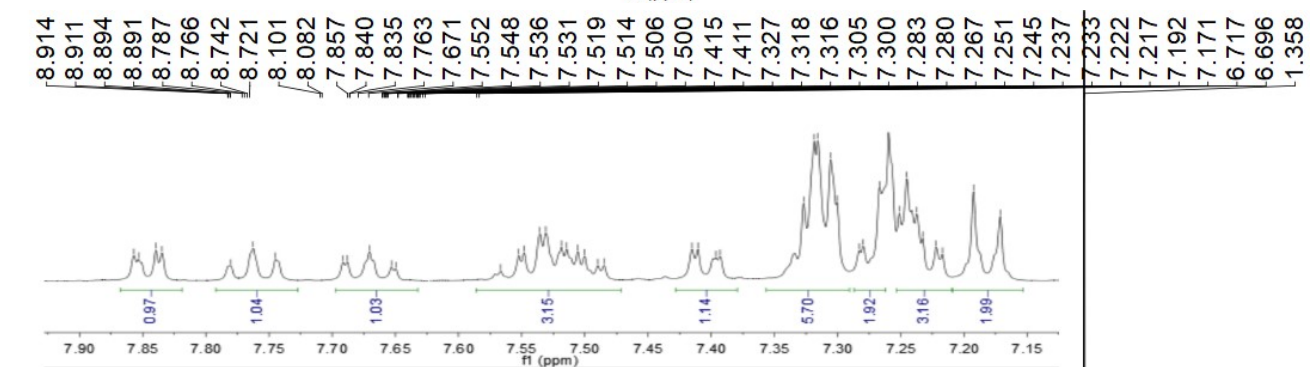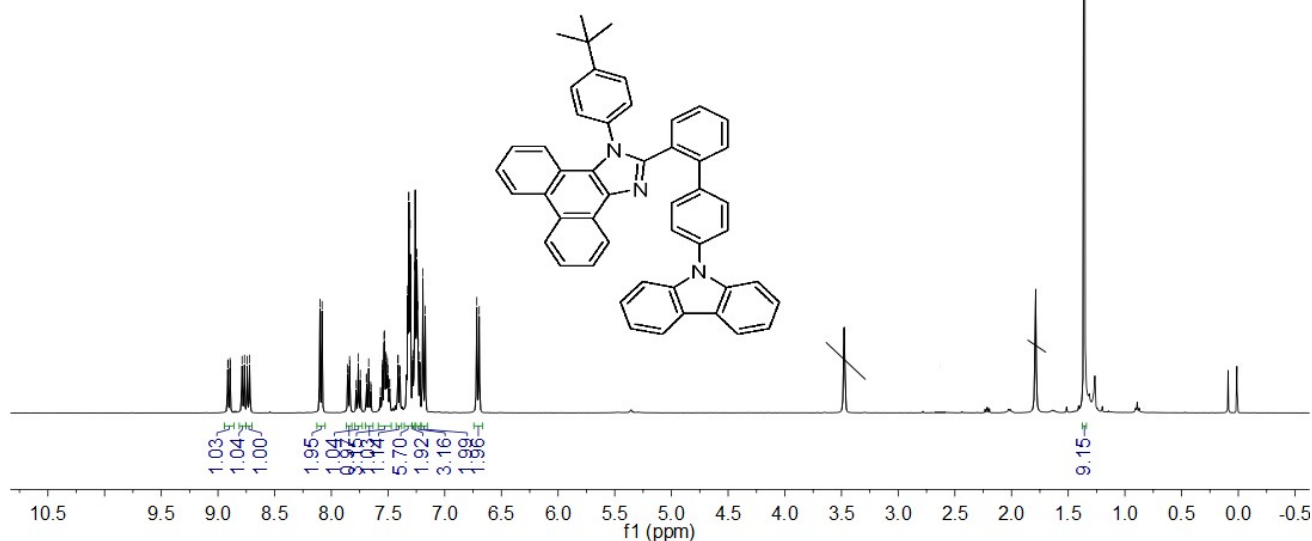



IV.  $^{13}\text{C}$  NMR spectra of the target molecules in  $\text{CDCl}_3$

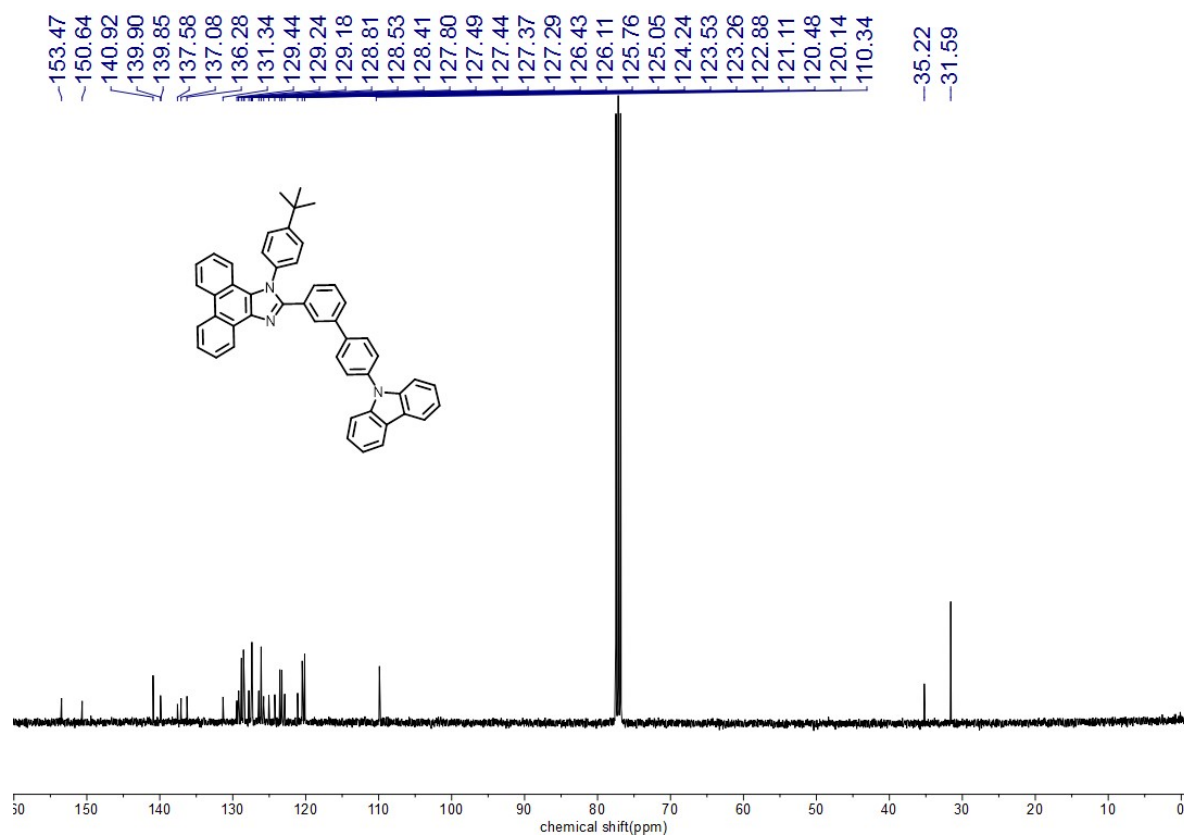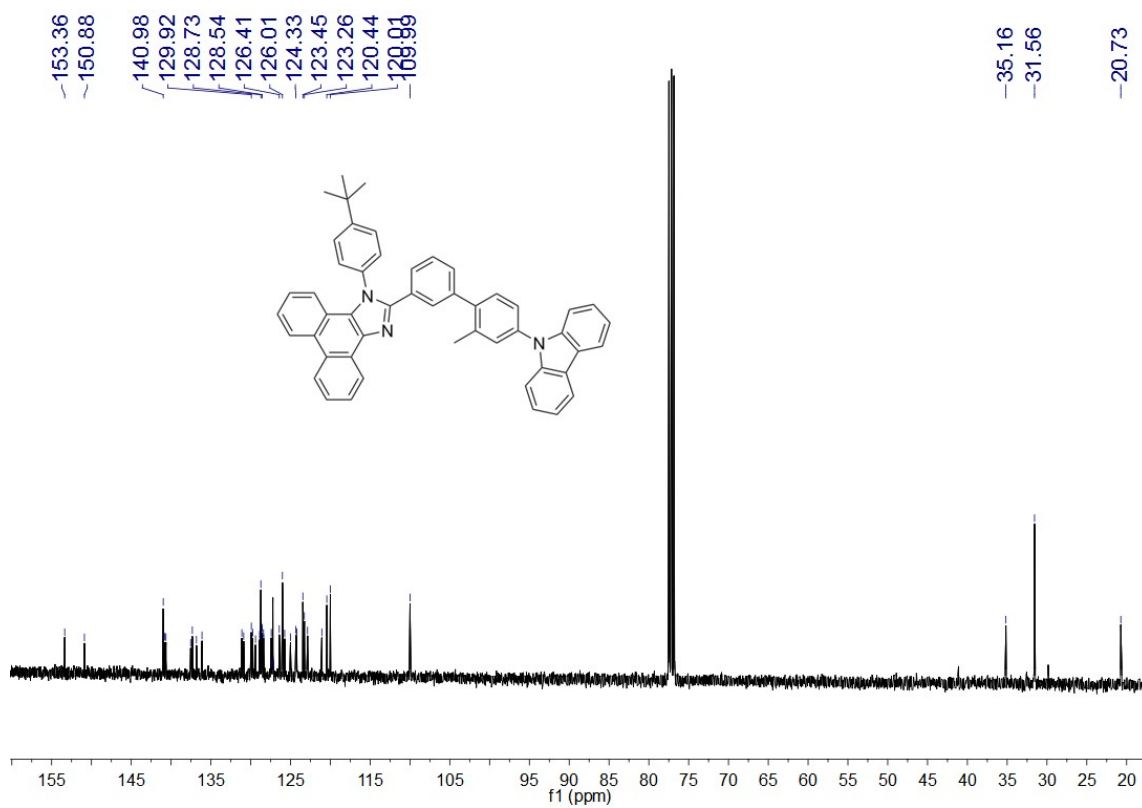



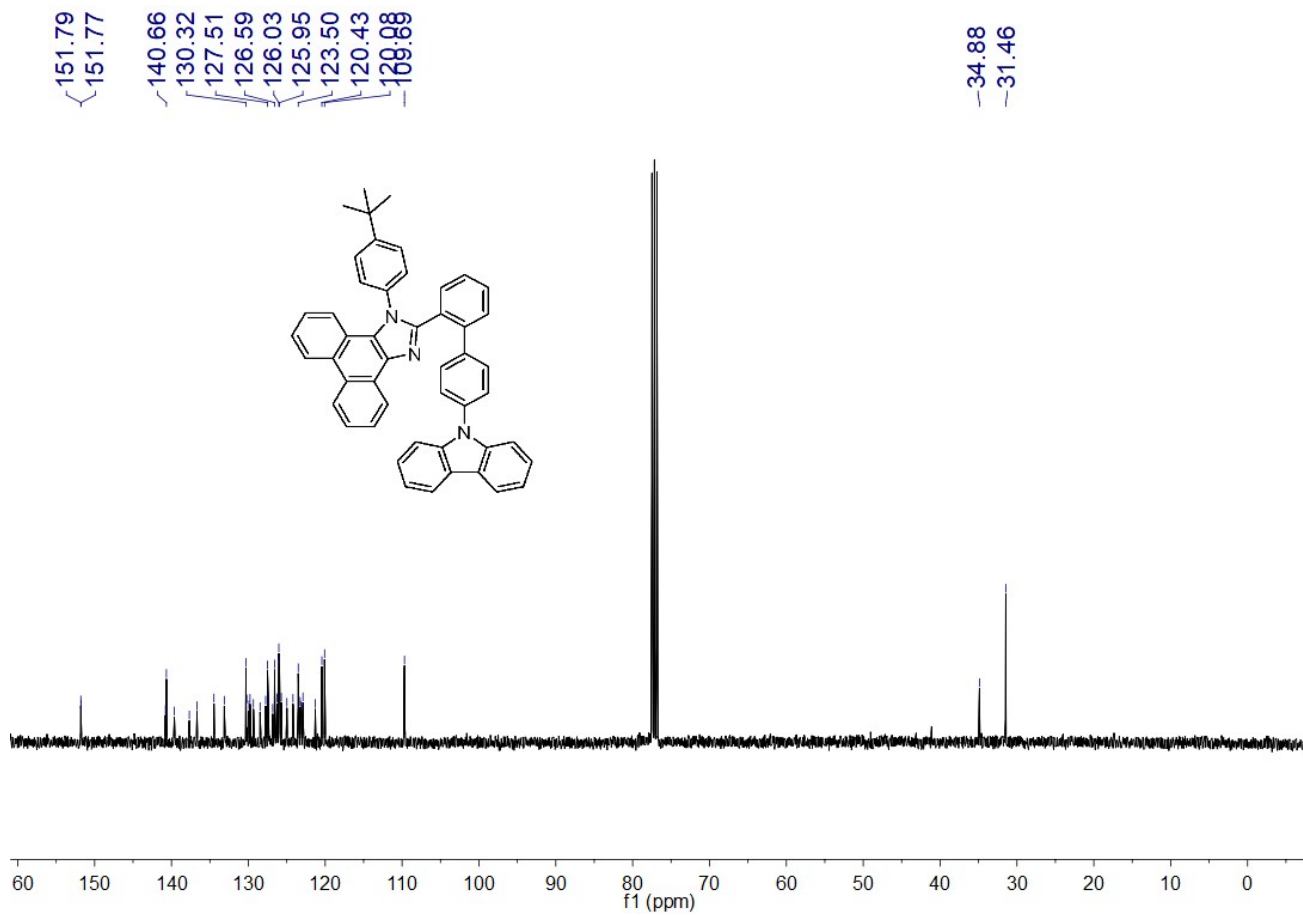

## V. HR-MS spectra of the target molecules

### Mass Spectrum SmartFormula Report

#### Analysis Info

Analysis Name D:\Data\ESITOF-LUH-20211229-LH-WXH-D2\_01.d  
Method ESI+100-800-200910.m  
Sample Name Q-TOF-WM-211011-WM-2\_01  
Comment

Acquisition Date 1/5/2022 3:14:51 PM

Operator BDAL@DE  
Instrument / Ser# microTOF-Q II 228888.10  
324

#### Acquisition Parameter

|             |         |                       |           |                  |           |
|-------------|---------|-----------------------|-----------|------------------|-----------|
| Source Type | ESI     | Ion Polarity          | Positive  | Set Nebulizer    | 1.6 Bar   |
| Focus       | Active  | Set Capillary         | 4000 V    | Set Dry Heater   | 220 °C    |
| Scan Begin  | 100 m/z | Set End Plate Offset  | -500 V    | Set Dry Gas      | 4.0 l/min |
| Scan End    | 900 m/z | Set Collision Cell RF | 200.0 Vpp | Set Divert Valve | Source    |

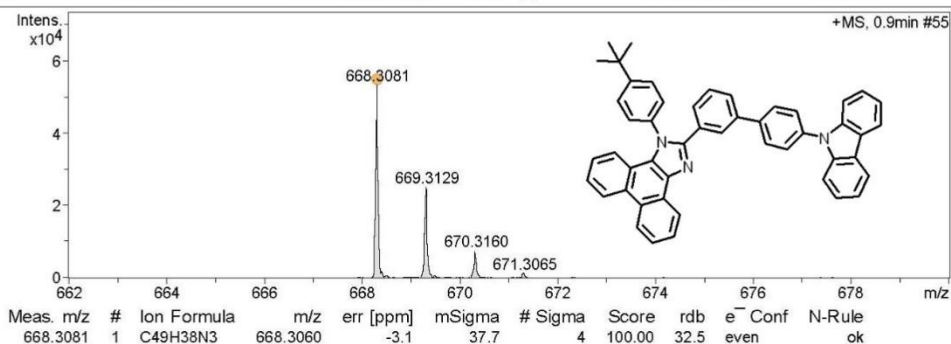

### Mass Spectrum SmartFormula Report

#### Analysis Info

Analysis Name D:\Data\ESITOF-LH-20220704-ZZT-E3-01.d  
Method ESI+100-800-200910.m  
Sample Name Q-TOF-WM-211011-WM-2\_01  
Comment

Acquisition Date 7/14/2022 10:33:54 AM

Operator BDAL@DE  
Instrument / Ser# microTOF-Q II 228888.10  
324

#### Acquisition Parameter

|             |         |                       |           |                  |           |
|-------------|---------|-----------------------|-----------|------------------|-----------|
| Source Type | ESI     | Ion Polarity          | Positive  | Set Nebulizer    | 1.6 Bar   |
| Focus       | Active  | Set Capillary         | 4000 V    | Set Dry Heater   | 200 °C    |
| Scan Begin  | 100 m/z | Set End Plate Offset  | -500 V    | Set Dry Gas      | 4.0 l/min |
| Scan End    | 900 m/z | Set Collision Cell RF | 200.0 Vpp | Set Divert Valve | Source    |

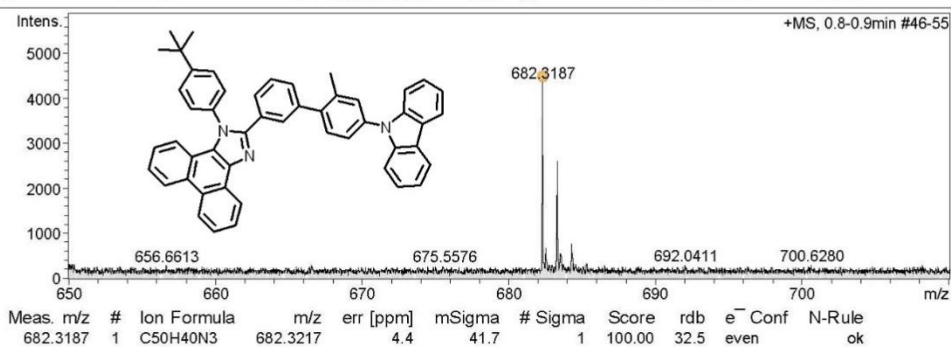

### Mass Spectrum SmartFormula Report

#### Analysis Info

Analysis Name D:\Data\ESITOF-LH-20220704-ZZT-E5-01.d  
 Method ESI+100-800-200910.m  
 Sample Name Q-TOF-WM-211011-WM-2\_01  
 Comment

Acquisition Date 7/14/2022 10:36:47 AM

Operator BDAL@DE  
 Instrument / Ser# microTOF-Q II 228888.10  
 324

#### Acquisition Parameter

|             |         |                       |           |                  |           |
|-------------|---------|-----------------------|-----------|------------------|-----------|
| Source Type | ESI     | Ion Polarity          | Positive  | Set Nebulizer    | 1.6 Bar   |
| Focus       | Active  | Set Capillary         | 4000 V    | Set Dry Heater   | 200 °C    |
| Scan Begin  | 100 m/z | Set End Plate Offset  | -500 V    | Set Dry Gas      | 4.0 l/min |
| Scan End    | 900 m/z | Set Collision Cell RF | 200.0 Vpp | Set Divert Valve | Source    |

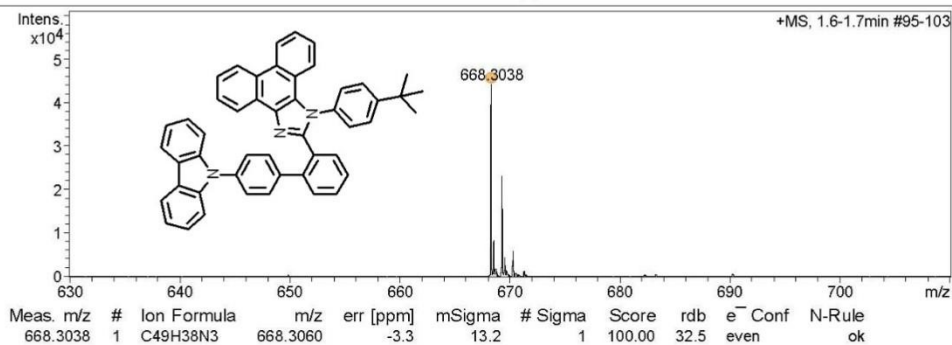

Supplement: d3tc02917d1.pdf [file d3tc02917d1.pdf]
